# Supplementary figures and images for: PAD-2-mediated citrullination of nucleophosmin provides an effective target for tumor immunotherapy
Source: HighWire-hosted journal article supplement (doi:10.1136/jitc-2021-003526), 2022-02-01

Supplementary Figure 7

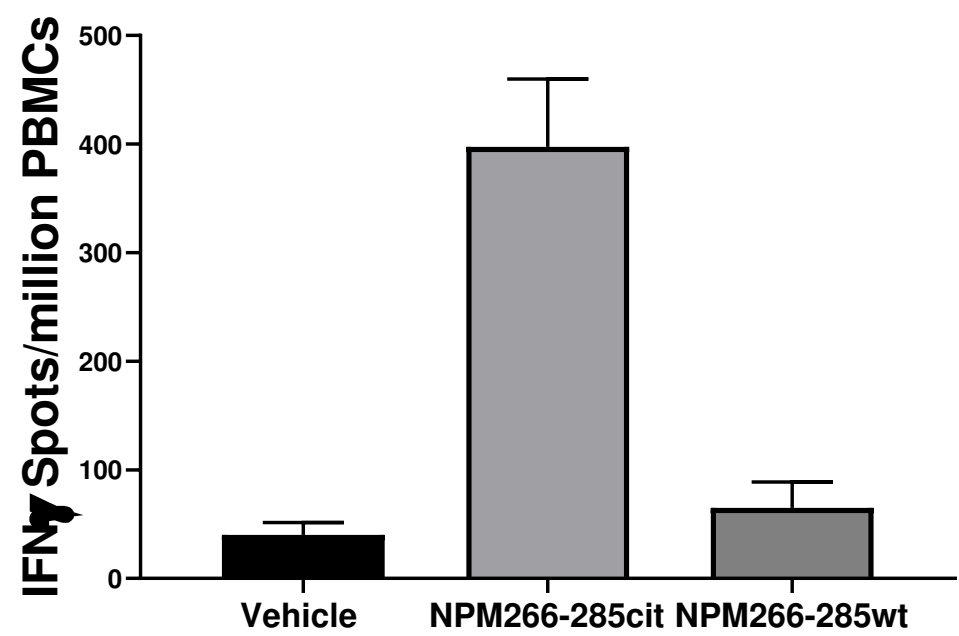

Supplement: jitc-2021-003526supp008_data_supplement.pdf [file jitc-2021-003526supp008_data_supplement.pdf]
